**Title:** Evaluating the Relationship between Neighborhood-Level Social Vulnerability and Patient Adherence to Ophthalmology Appointments

**Running Title:** Neighborhood-Level Social Vulnerability and Appointment Adherence

**Authors:** Angelica C. Scanzera, OD, MPH<sup>1</sup>, Sasha Kravets, MA<sup>1,2</sup>, Joelle A. Hallak, PhD<sup>1</sup>, Hugh Musick, MBA<sup>3</sup>, Jerry A. Krishnan, MD, PhD<sup>3</sup>, R.V. Paul Chan, MD, MSc<sup>1</sup>, Sage J. Kim, PhD<sup>4</sup>

**Author affiliations:**

<sup>1</sup> Department of Ophthalmology and Visual Sciences, Illinois Eye and Ear Infirmary  
University of Illinois Chicago  
1855 W. Taylor Street  
Chicago, IL 60612, United States

<sup>2</sup> Division of Epidemiology and Biostatistics, School of Public Health  
University of Illinois Chicago  
1603 W. Taylor Street  
Chicago, IL 60612, United States

<sup>3</sup> Institute for Healthcare Delivery Design, Population Health Sciences Program  
University of Illinois Chicago  
1220 S. Wood Street  
Chicago, IL 60657, United States

<sup>4</sup> Division of Health Policy & Administration, School of Public Health  
University of Illinois Chicago

1603 W. Taylor Street  
Chicago, IL 60612, United States

**Corresponding author contact information:**

Angelica C. Scanzera  
Department of Ophthalmology and Visual Sciences  
Illinois Eye and Ear Infirmary, University of Illinois at Chicago  
1855 W. Taylor Street  
Chicago, IL 60612  
Email: [ascanz@uic.edu](mailto:ascanz@uic.edu)  
Phone: 312-996-5411  
Fax: 312-996-4255

**Meeting presentation:** Early findings from this work were presented during the Implementation Science poster session at the Midwest Clinical and Translational Research Meeting in Chicago, IL on March 4, 2022.

**Acknowledgments:**

The authors thank the Center for Health Equity Research (CHER) Chicago for their invaluable collaboration.

**Funding/support:** This work was supported by funding by NIH/NEI K12 EY021475 (Scanzera), NIH/NEI EY001792, NIH/NIMHD U54MD012523 (Kim, Scanzera), and an unrestricted grant to the Department of Ophthalmology and Visual Sciences from Research to Prevent Blindness. The funding organizations had no role in the design or conduct of this research

50  
51  
52  
53  
54  
55  
56  
57  
58  
59  
60  
61  
62  
63  
64  
65  
66  
67  
68  
69  
70  
71  
72  
73  
74  
75

**Conflict of Interest:** Dr. R.V. Paul Chan discloses the following 1) Alcon; 2) Novartis; 3) Phoenix (Unpaid SAB). Dr. Krishnan reports research funding from Regeneron, and consulting fees from GlaxoSmithKline and Bdata, Inc. Dr. Hallak discloses the following: Abbvie (Employment). The following authors have no financial disclosures: Dr. Angelica C. Scanzera, Sasha Kravets, Hugh Musick. Dr. Sage Kim. All authors attest that they meet the current ICMJE criteria for authorship.

# **Disclaimer statement**

The views expressed in this manuscript are those of the authors and do not necessarily represent the views of the National Eye Institute; the National Institute on Minority Health and Health Disparities; the National Institutes of Health.

**Address for Reprints:** Angelica Scanzera, OD, MPH  
Illinois Eye and Ear Infirmary, University of Illinois at Chicago  
1855 W. Taylor Street  
Chicago, IL 60612

# **Acronyms:**

SVI Social Vulnerability Index  
SD Standard Deviation  
IQR Inter-Quartile Range

**Key Words:** Social vulnerability index, adherence, health equity

## **Abstract**

**Objective:** Little is known about the association between neighborhood characteristics and non-adherence to attending scheduled ophthalmology appointments. The purpose of this study was to examine the association between neighborhood-level social vulnerability and adherence to scheduled ophthalmology appointments.

**Design:** Retrospective cohort study.

**Participants:** Adults aged 18 years and older with scheduled ophthalmology appointments between September 12, 2020, and February 8, 2021.

**Methods:** A single-center study was conducted at the University of Illinois Chicago Illinois Eye and Ear Infirmary, an urban tertiary care referral center in Chicago, Illinois. Primary exposure is neighborhood-level Social Vulnerability Index (SVI), based on the patient's address of residence. The SVI ranks (possible range 0 to 1) each census tract on 15 social factors into four related themes (socioeconomic status, household composition & disability, minority status & language, and housing type & transportation). Higher SVI rankings indicate higher levels of social vulnerability. The overall SVI ranking and rankings for each of the four themes were analyzed separately as the primary exposure of interest in multivariable logistic regression models that controlled for age, sex, status (new or established appointment), race, and distance from clinic.

**Main Outcome Measure:** Non-adherence to attending scheduled ophthalmology appointments, defined as missing more than 25% of scheduled appointments.

**Results:** A total of 8,322 unique patients (41% non-Hispanic Black, 24% Hispanic, 22% non-Hispanic White) had scheduled appointments during the five-month study period (range 1 to 23 appointments). Of those, 28% of patients were non-adherent to appointments. In multivariable logistic regression models, non-adherence to appointments was associated with living in higher

SVI ranking neighborhoods (socioeconomic status: (adjusted odds ratio [95% confidence interval]) 2.38 [1.94, 2.91]; household composition/disability: 1.51 [1.26, 1.81]; minority status/language: 2.03 [1.55, 2.68]; housing type/transportation: 1.41 [1.16, 1.73]; and overall SVI: 2.46 [1.99, 3.06]).

**Conclusions:** Neighborhood-level measures of social vulnerability are associated with greater risk of non-adherence to scheduled ophthalmology appointments. Studies to better understand these neighborhood-level vulnerabilities are needed to inform the design and evaluation of multi-level (individual and neighborhood) strategies to reduce disparities in access to ophthalmology care.

The Healthy People 2030 Initiative has maintained a goal to increase the proportion of adults who have had a comprehensive eye exam in the last 2 years.<sup>1</sup> Despite strong evidence supporting this initiative, disparities continue to exist. The prevalence of glaucoma, diabetic retinopathy, and overall visual impairment is greater in Blacks and Hispanics compared to non-Hispanic Whites.<sup>2, 3</sup> In addition to biologic factors, these findings are the result of social determinants of health,<sup>3-5</sup> and recognizing the social context contributing to these disparities is critical.

Vision loss is a public health issue disproportionately affecting marginalized communities,<sup>6-11</sup> It can limit every aspect of an individual's daily life, including communication, education, independence, mobility, and career goals,<sup>12</sup> and is one of the most feared disabilities in the United States.<sup>13</sup> Screening for refractive error and early eye disease could prevent a high proportion of unnecessary vision loss or blindness.<sup>10</sup> For example, one study found that 50% of subjects receiving an ophthalmologic screening examination had an improvement in vision after refractive correction alone.<sup>14</sup> However, minorities and people of low socioeconomic status underutilize eye care, are disproportionately affected by barriers to care, and are at the greatest risk of vision loss.<sup>6, 7</sup>

It is widely accepted that an individual's health is determined primarily by factors outside of the healthcare system, such as poverty, unemployment, or lack of access to care.<sup>15, 16</sup> In a previous study at our institution early in the COVID-19 pandemic, we found that individuals scheduled for recommended urgent eye appointments who did not adhere more often came from neighborhoods with a greater proportion of Blacks, greater unemployment rates, and a greater number of COVID-19 related deaths.<sup>17</sup> A higher neighborhood unemployment rate continued to

be significantly associated with non-adherence after controlling for race and cumulative deaths from COVID-19, showing the importance of understanding neighborhood context.

Little is understood about the modifiable and non-modifiable neighborhood-level determinants contributing to issues in eye care access. One potential tool to consider in better understanding these neighborhood-level determinants is the Social Vulnerability Index (SVI). Social vulnerability is defined as the potential negative effects on communities caused by external stressors on human health.<sup>18</sup> Such stressors include natural disasters or health crises such as the ongoing COVID-19 pandemic, which disproportionately affect resource poor communities and contribute to human suffering.<sup>19</sup> In particular, the Centers for Disease Control and Prevention (CDC) SVI is a composite measure that represents neighborhood relative vulnerability compared to all other communities nationally by census tract. U.S. Census data is used to create a percentile rank for each census tract using 15 social factors organized into 4 themes: socioeconomic status, household composition & disability, minority status & language, and housing type & transportation (**Figure 1**). Though SVI is typically used in response to emergency events or disasters,<sup>20</sup> it has recently been studied in healthcare to better understand access and outcomes.<sup>21, 22</sup>

In the interest of improving eye health equity, we utilized SVI as a potentially applicable measure to assess disparities in adherence and target interventions. The objective of this study was to examine the association between neighborhood-level social vulnerability and adherence to scheduled ophthalmology office appointments at an urban tertiary referral center.

## METHODS

### *Design, Setting, & Participants*

In this retrospective cohort study, we assessed the association between patient individual-level variables and neighborhood-level social vulnerability on adherence to scheduled ophthalmology appointments at an urban tertiary care referral center. All individuals 18 years and older scheduled for an ophthalmology appointment between September 12, 2020, and February 8, 2021, at the Department of Ophthalmology at the University of Illinois Chicago were included in this study. This study was approved by the University of Illinois at Chicago Institutional Review Board (protocol 2021-0177). This research adhered to the tenets of the Declaration of Helsinki.

### *Exposure*

The primary exposure of interest is neighborhood-level social vulnerability index (SVI) based on the patient's address of residence. The 2018 Centers for Disease Control and Prevention SVI was used for this study.<sup>18</sup> Percentile ranking values range from 0 to 1, with higher values indicating greater vulnerability. Each census tract receives a separate percentile ranking for individual themes as well as an overall composite score. Residential addresses were geocoded using ArcGIS, a geographic information systems software, to append U.S. Census community characteristics including overall SVI, SVI of each theme, and each of the 15 social factors by census tract.

Secondary exposures included individual-level variables, which were provided through a medical record review. Variables included age, gender, race/ethnicity, insurance status, distance from the clinic (miles), new patient status, number of appointments scheduled during the study period, and appointment status (reported as completed or no-show in the record). A patient was considered new if they had not previously been evaluated in the service they were scheduled in.



## **Outcome**

The main outcome of interest was non-adherence to attending scheduled ophthalmology appointments. Patients had varying numbers of scheduled appointments (between 1 and 23). We looked at those who missed 20%, 25%, and 30% of their scheduled appointments, and the proportion of individuals who would be defined as non-adherent was similar (29.6%, 28%, 27.9%). For the purposes of this study, a patient was considered non-adherent if they missed more than 25% of scheduled appointments.

## **Statistical Analysis**

Mean  $\pm$  Standard Deviation (SD) or median  $\pm$  inter-quartile range (IQR) and proportions were reported for continuous and categorical variables, respectively. A t-test or Wilcoxon rank-sum test was conducted to assess a difference in continuous variables by adherence status, and a Chi-square test or Fisher's exact test was used to assess a difference in categorical variables and adherence status. SVI rankings for each of the four themes, as well as an overall composite ranking, were analyzed separately as the primary exposure of interest in multivariable logistic regression models that controlled for age, sex, status (new or established appointment), race/ethnicity, and distance from clinic. An interaction between race and SVI was initially examined but was found to be insignificant. Using the logistic regression model, the predicted probability of non-adherence was determined for each patient. A p-value of  $\leq 0.05$  was considered statistically significant. Data were analyzed using R (R Core Team (2019). R: URL <https://www.R-project.org/>).

## **RESULTS**

A total of 8,322 unique patients were scheduled for an ophthalmology appointment during the study period. The number of scheduled appointments ranged from 1 to 23 per patient. Just

over 1 in 4 (28%) patients were non-adherent. Mean age was 57  $\pm$ 17 years. Most patients were women (59.2%), and non-Hispanic Black (41.2%), Hispanic (24.1%), or non-Hispanic White (21.9%). Over two-thirds of patients had public insurance (37.2% Medicare, 34.5% Medicaid), and 29.7% were new patients. Median (IQR) distance to the clinic that patients traveled was 7.0 ( $\pm$ 10) miles (**Table 1**). Patients scheduled for an ophthalmology appointment come from communities where the mean percentage of persons living below poverty is 20.3%, unemployment rate is at 10.6%, minorities accounted for 68.3%, and per capita income median (IQR) estimate is \$24,541 (\$18,557) (ranging from \$2,530 to \$130,543).

### ***Individual-level Determinants***

Table 1 summarizes individual characteristics by adherence. There was no significant difference by sex; however, non-adherent patients were slightly younger (54.2 vs. 57.8 years;  $P < 0.01$ ) and living closer (6.92 vs. 7.37 miles;  $P < 0.01$ ). Non-adherence was greatest among Blacks (36.1%), followed by Hispanics (30.3%), other (26.6%), Asian (18.0%), and White (13.0%;  $P < 0.01$ ). New patients were more likely to be non-adherent (32.2%) compared to established patients (26.3%;  $P < 0.01$ ). Non-adherence was also greatest among uninsured patients (45.5%) followed by those with Medicaid (35.9%).

### ***Neighborhood-level Determinants***

Median overall SVI in this population was 0.70. Median SVI was higher in non-adherent (0.78) compared to adherent patients (0.66;  $P < 0.01$ ). In multivariable logistic regression models, non-adherence to appointments was more likely with higher SVI rankings (socioeconomic status: (adjusted odds ratio [95% confidence interval]) 2.38 [1.94, 2.91]; household composition/disability: 1.51 [1.26, 1.81]; minority status/language: 2.03 [1.55, 2.68]; housing type/transportation: 1.41 [1.16, 1.73]; and overall SVI: 2.46 [1.99, 3.06]). **Table 2** provides the multivariable regression model using overall SVI as the primary exposure. Median SVI was

greater in non-adherent compared to adherent patients for each of the four individual themes (P<0.01). The greatest difference was noted for socioeconomic status, in which non-adherent patients had a median SVI of 0.82 compared to 0.67 in adherent patients. **Figure 2** further illustrates themed median SVI by adherence.

Median neighborhood SVI was highest among Blacks (0.79) followed by Hispanics (0.77), other (0.57), Asians (0.45), and Whites (0.30). When controlling for age, sex, patient status, distance from clinic and overall SVI, the odds of non-adherence (95% CI) were 2.8 (2.39, 3.37) and 2.1 (1.78, 2.55) for non-Hispanic Blacks and Hispanics, respectively, when compared to non-Hispanic Whites. Using the multivariable model, we computed the predicted probability of non-adherence for a range of SVI from 0-1 for each racial or ethnic group. **Figure 3** illustrates that as neighborhood SVI increases, the probability of non-adherence increases, regardless of a racial category. Additionally, we see that the probability of non-adherence is highest for Blacks, regardless of neighborhood SVI, and increases at a somewhat faster rate, compared to all other races. Specifically, the mean predicted probability of non-adherence for non-Hispanic Blacks is 0.32, compared to 0.14 for non-Hispanic Whites.

## DISCUSSION

We evaluated the effects of individual and neighborhood-level factors on adherence to scheduled ophthalmology appointments at an urban tertiary referral center. The key findings of this study are: 1) greater neighborhood-level social vulnerability is associated with a greater likelihood of non-adherence to ophthalmology appointments, and 2) after adjusting for neighborhood-level vulnerability and other relevant factors, race/ethnicity continued to be significantly associated with non-adherence to appointments.

We demonstrated that CDC SVI is a useful tool to examine disparities in adherence and outcomes within ophthalmology. Though CDC SVI was established to assist with understanding vulnerability to disasters, this study demonstrates the use of SVI to examine health disparities, particularly in ophthalmology appointment adherence. To the authors' knowledge, this is the first study that assesses the use of the CDC's SVI in ophthalmology. However, SVI has been widely used in health science research. For example, higher neighborhood SVI has been associated with an increased number of chronic conditions,<sup>23</sup> worse surgical outcomes,<sup>21</sup> and increased risk of mortality.<sup>24</sup> The use of SVI to understand the patient's neighborhood context expands social determinants of health outcomes in ophthalmic research.

Overall, greater neighborhood-level SVI is associated with a greater likelihood of non-adherence to ophthalmology appointments, and the largest difference in adherence was observed with the socioeconomic status SVI theme. Low socioeconomic status is associated with a higher incidence of open globe injury,<sup>25</sup> presenting at a more advanced stage of age-related macular degeneration,<sup>26</sup> a greater risk of developing glaucoma,<sup>27</sup> and higher rates of blindness.<sup>28</sup> Residency in more disadvantaged neighborhoods is associated with poor adherence to both diabetic retinopathy screening<sup>29, 30</sup> and physician recommended urgent ophthalmology appointments.<sup>17</sup> These findings indicate the importance of understanding the communities our patients reside in. Moving forward, SVI is being integrated into many electronic health records, which opens the opportunity for incorporating social context into the standard of care and clinical interventions.

While non-adherence was higher in racial/ethnic minorities, there was also a stark difference in neighborhood-level vulnerability by race/ethnicity in our patient population. Median neighborhood-level SVI in Blacks and Hispanics were significantly higher than in Whites (0.79, 0.77, and 0.30, respectively). Neighborhood level inequities are well recognized and

exacerbated by residential segregation. Chicago is a highly segregated city, with a dissimilarity index over 56, meaning that 56% of Chicago's population would have to move to another neighborhood to balance the composition of individual neighborhoods to the region's general demographic composition.<sup>31</sup> Racial residential segregation affects how neighborhood investment decisions are made which has resulted in uneven access to health care<sup>32, 33</sup> and consequently, shorter life expectancies in highly segregated Black communities.<sup>34, 35</sup> Racial minorities are more likely to live in underserved areas with lower levels of health and social service opportunities, further perpetuating poor health outcomes.<sup>36-39</sup> The National Institute on Minority Health and Health Disparities (NIMHD) Research Framework describes a multidimensional model that depicts a comprehensive set of health determinants which includes domains of influence over the life course (biological, behavioral, physical/built environment, sociocultural environment, and the health care system) and levels of influence (individual, interpersonal, community, and societal).<sup>40</sup> The intersections of the domains with each level of influence have distinct effects on health outcomes. Community and societal investment could improve individual behavior, in our case, adherence to appointments, and health outcomes.

Interestingly, after adjusting for neighborhood-level SVI and other relevant factors, Blacks and Hispanics continued to have greater odds of non-adherence to scheduled ophthalmology appointments compared to Whites, indicating that other neighborhood and individual-level factors are at work, beyond SVI. This is consistent with a study of almost 80,000 Medicare beneficiaries with glaucoma which found that eye care utilization disparities were greatest among Blacks and Hispanics, even after stratifying by socioeconomic status.<sup>41</sup> One hypothesis for this difference focuses on concentrated affluence rather than disadvantage. Brooks-Gunn et al argued that concentrated socioeconomic resources or affluence, not captured by SVI, can have a positive influence even after controlling for individual family resources.<sup>42</sup> While individual-level social capital has the greatest influence on health,<sup>43, 44</sup> increased neighborhood-

level social capital is also positively related to better health.<sup>43-46</sup> in our patient population, minorities live in more disadvantaged areas while Whites live in less disadvantaged areas. This spatial inequality results in social, economic, and political isolation,<sup>47</sup> which could explain the differences in eye care utilization in racial and ethnic minorities found in our study not captured with SVI.

Another possibility is that racial discrimination could be a deterrent to medical care. Racial discrimination is a risk factor for disease and a contributor to structural racism in health care.<sup>48</sup> Findings from a large meta-analysis found that individuals who reported experiences of racial discrimination were two to three times as likely to be less trusting of health care workers and systems, perceive lower quality of and satisfaction with care, and express less satisfaction with patient-provider communication and relationships. Experiencing racism was also associated with delays in seeking health care and reduced adherence to medical recommendations.<sup>49</sup> Within eye care, lack of trust, empathy, or patient-doctor communication have each been emphasized as barriers to utilization in populations at high risk of vision loss,<sup>6</sup> and minorities have reported feeling less respected by health care professionals compared to non-Hispanic Whites.<sup>50</sup> There have been several calls to diversify the workforce to improve patient care and focus on improving health equity through research<sup>51, 52</sup> as both ophthalmology and the field of medicine currently lack diversity.<sup>53</sup> Given these findings, it is imperative for providers to acknowledge that structural racism exists in healthcare, recognize and work toward ways to address implicit bias, and diversify the workforce.

Our study has several limitations that should be considered. 1) Most notably, this study investigated data at a single center. Given that our patient population is more diverse than the make-up of the city of Chicago, this may limit the generalizability of our study; however, these findings are most relevant to more vulnerable populations. Future multi center studies are

needed to confirm these findings. 2) We also focused on demographic factors and did not leverage all variables available within the medical record. The patient's ocular diagnosis and comorbidities should be considered in future studies to consider interaction or confounding variables. 3) This study used 2018 CDC SVI, the latest available SVI, which was data reported prior to the pandemic. Neighborhood factors have likely changed since the onset of the pandemic. We imagine disparities may be even greater than what is reported. 4) Lastly, an important consideration is that neighborhood-level SVI helps us to understand the community our patients are coming from but cannot be easily applied to the individual. This data suggests the use of SVI to identify patients at higher risk of non-adherence; however, interventions should be considered at the patient, health-system, community, and policy levels.

Previous reports of ambulatory care no-show risk prediction models have focused primarily on hospital components and individual behavior, such as appointment lead time, appointment rescheduled by the provider, or history of previous no-show;<sup>54, 55</sup> These fail to take social context into account. Further, interventions focus on clinical productivity, suggesting options such as added reminder calls or text messages to improve adherence,<sup>56</sup> or creating overbook slots, which fail to address factors driving no-shows and likely intensify health inequities. Findings from this study help us understand who is less likely to show for an appointment. Utilizing variables that account for social context, there is potential to identify patients at higher risk of no-show and provide them with targeted interventions.

This study serves as a step in preintervention planning.<sup>57</sup> Participatory science elevates patient and community voices and is essential to gain insight into how our patients interact with the healthcare system.<sup>58</sup> In order to generate changes in healthcare delivery to promote health equity, a critical next step is to engage stakeholders, including patients and providers, to identify

the barriers and facilitators that exist after scheduling an eye appointment that prevent a patient from adhering to this appointment.

In this study, we examined the association between neighborhood-level social vulnerability and adherence to scheduled ophthalmology appointments at an urban tertiary care referral center. We found that higher neighborhood-level social vulnerability is associated with an increased risk of non-adherence to ophthalmology appointments. Poor adherence to appointments is not entirely attributed to SVI in minorities, as race/ethnicity continued to be significantly associated with non-adherence to scheduled appointments after controlling for other relevant factors. These findings suggest the potential effects of individual and neighborhood-level determinants on non-adherence to scheduled ophthalmology appointments. Studies to inform the design and evaluation of multi-level (individual and neighborhood) strategies to reduce disparities in access to ophthalmology care are needed.



# References

1. Office of Disease Prevention and Health Promotion. Healthy People 2030. U.S. Department of Health and Human Services. Accessed September 8, 2021.
2. Klein R, Klein BE. The prevalence of age-related eye diseases and visual impairment in aging: current estimates. *Invest Ophthalmol Vis Sci*. Dec 13 2013;54(14):ORSF5-ORSF13. doi:10.1167/iops.13-12789
3. Peek ME, Cargill A, Huang ES. Diabetes health disparities: a systematic review of health care interventions. *Med Care Res Rev*. Oct 2007;64(5 Suppl):101S-56S. doi:10.1177/1077558707305409
4. CDC. *The State of Vision, Aging, and Public Health in America*. 2011. <http://www.aafp.org/afp/2013/0815/p241.html>
5. Thornton RL, Glover CM, Cene CW, Glik DC, Henderson JA, Williams DR. Evaluating Strategies For Reducing Health Disparities By Addressing The Social Determinants Of Health. *Health Aff (Millwood)*. Aug 1 2016;35(8):1416-23. doi:10.1377/hlthaff.2015.1357
6. Elam AR, Lee PP. High-risk populations for vision loss and eye care underutilization: a review of the literature and ideas on moving forward. *Survey of ophthalmology*. Jul-Aug 2013;58(4):348-58. doi:10.1016/j.survophthal.2012.07.005
7. Rasendran C, Tye G, Knusel K, Singh RP. Demographic and Socioeconomic Differences in Outpatient Ophthalmology Utilization in the United States. *American journal of ophthalmology*. Oct 2020;218:156-163. doi:10.1016/j.ajo.2020.05.022
8. Lee DJ, Lam BL, Arora S, et al. Reported eye care utilization and health insurance status among US adults. *Arch Ophthalmol*. Mar 2009;127(3):303-10. doi:10.1001/archophthalmol.2008.567
9. Lee YH, Chen AX, Varadaraj V, et al. Comparison of Access to Eye Care Appointments Between Patients With Medicaid and Those With Private Health Care Insurance. *JAMA ophthalmology*. 2018;136(6):622-629. doi:10.1001/jamaophthalmol.2018.0813
10. Varma R, Vajaranant TS, Burkemper B, et al. Visual Impairment and Blindness in Adults in the United States: Demographic and Geographic Variations From 2015 to 2050. *JAMA ophthalmology*. Jul 1 2016;134(7):802-9. doi:10.1001/jamaophthalmol.2016.1284
11. National Academies of Sciences E, Medicine, Health, et al. The National Academies Collection: Reports funded by National Institutes of Health. In: Welp A, Woodbury RB, McCoy MA, Teutsch SM, eds. *Making Eye Health a Population Health Imperative: Vision for Tomorrow*. National Academies Press (US) Copyright 2016 by the National Academy of Sciences. All rights reserved.; 2016.
12. Christ SL, Zheng DD, Swenor BK, et al. Longitudinal relationships among visual acuity, daily functional status, and mortality: the Salisbury Eye Evaluation Study. *JAMA ophthalmology*. Dec 2014;132(12):1400-6. doi:10.1001/jamaophthalmol.2014.2847
13. CDC. Basics of Vision and Eye Health- Fast Facts. Updated 2016. 2017. <https://www.cdc.gov/visionhealth/basics/ced/fastfacts.htm>
14. Tielsch JM, Sommer A, Witt K, Katz J, Royall RM. Blindness and visual impairment in an American urban population. The Baltimore Eye Survey. *Arch Ophthalmol*. Feb 1990;108(2):286-90. doi:10.1001/archopht.1990.01070040138048
15. County Health Rankings Model. County Health Rankings & Roadmaps. <https://www.countyhealthrankings.org/explore-health-rankings/measures-data-sources/county-health-rankings-model>

16. Hood CM, Gennuso KP, Swain GR, Catlin BB. County Health Rankings: Relationships Between Determinant Factors and Health Outcomes. *Am J Prev Med*. Feb 2016;50(2):129-35. doi:10.1016/j.amepre.2015.08.024
17. Scanzerla AC, Thermoziar S, Chang AY, Kim SJ, Chan RVP. Adherence to Urgent Eye Visits during the COVID-19 Pandemic: A Population Characteristics Study. *Ophthalmic Epidemiol*. Dec 13 2021:1-8. doi:10.1080/09286586.2021.2015785
18. Agency for Toxic Substances and Disease Registry. CDC/ATSDR Social Vulnerability Index. CDC. Accessed July 28, 2021.
19. Geospatial Research Analysis and Services Program. *CDC Social Vulnerability Index (CDC SVI)*. 2021.
20. Thomas DSK, Phillips BD, Lovekamp WE, Fothergill A. *Social Vulnerability to Disasters*. 2013.
21. Diaz A, Hyer JM, Barmash E, Azap R, Paredes AZ, Pawlik TM. County-level Social Vulnerability is Associated With Worse Surgical Outcomes Especially Among Minority Patients. *Ann Surg*. Dec 1 2021;274(6):881-891. doi:10.1097/sla.0000000000004691
22. Givens M, Teal EN, Patel V, Manuck TA. Preterm birth among pregnant women living in areas with high social vulnerability. *Am J Obstet Gynecol MFM*. Sep 2021;3(5):100414. doi:10.1016/j.ajogmf.2021.100414
23. Nguyen TN, Ngangue P, Bouhali T, Ryan BL, Stewart M, Fortin M. Social Vulnerability in Patients with Multimorbidity: A Cross-Sectional Analysis. *Int J Environ Res Public Health*. Apr 8 2019;16(7)doi:10.3390/ijerph16071244
24. Ouvrard C, Avila-Funes JA, Dartigues JF, Amieva H, Tabue-Teguo M. The Social Vulnerability Index: Assessing Replicability in Predicting Mortality Over 27 Years. *J Am Geriatr Soc*. Jun 2019;67(6):1305-1306. doi:10.1111/jgs.15812
25. Kousiouris P, Klavdianou O, Douglas KAA, et al. Role of Socioeconomic Status (SES) in Globe Injuries: A Review. *Clin Ophthalmol*. 2022;16:25-31. doi:10.2147/opth.S317017
26. Levinger N, Beykin G, Grunin M, et al. Socioeconomic status and visual outcome in patients with neovascular age-related macular degeneration. *Eur J Ophthalmol*. May 2021;31(3):1094-1100. doi:10.1177/1120672120920783
27. Shaikh Y, Yu F, Coleman AL. Burden of undetected and untreated glaucoma in the United States. *American journal of ophthalmology*. Dec 2014;158(6):1121-1129.e1. doi:10.1016/j.ajo.2014.08.023
28. Dandona R, Dandona L. Socioeconomic status and blindness. *Br J Ophthalmol*. Dec 2001;85(12):1484-8. doi:10.1136/bjo.85.12.1484
29. Yusuf R, Chen EM, Nwanyanwu K, Richards B. Neighborhood Deprivation and Adherence to Initial Diabetic Retinopathy Screening. *Ophthalmol Retina*. May 2020;4(5):550-552. doi:10.1016/j.oret.2020.01.016
30. Liu Y, Zupan NJ, Shiyanbola OO, et al. Factors influencing patient adherence with diabetic eye screening in rural communities: A qualitative study. *PLoS One*. 2018;13(11):e0206742. doi:10.1371/journal.pone.0206742
31. America's least (and most) segregated cities. City Observatory; August 17, 2020, 2020.
32. Kim SJ, Ramirez-Valles J, Watson K, et al. Fostering health equity research: Development and implementation of the Center for Health Equity Research (CHER) Chicago. *J Clin Transl Sci*. Feb 2020;4(1):53-60. doi:10.1017/cts.2019.415

33. Alvidrez J, Castille D, Laude-Sharp M, Rosario A, Tabor D. The National Institute on Minority Health and Health Disparities Research Framework. *American journal of public health*. Jan 2019;109(S1):S16-s20. doi:10.2105/ajph.2018.304883
34. Gary-Webb TL, Egnot NS, Nugroho A, Dubowitz T, Troxel WM. Changes in perceptions of neighborhood environment and Cardiometabolic outcomes in two predominantly African American neighborhoods. *BMC Public Health*. 2020/01/14 2020;20(1):52. doi:10.1186/s12889-019-8119-9
35. Xiao YK, Graham G. Where we live: The impact of neighborhoods and community factors on cardiovascular health in the United States. *Clin Cardiol*. Jan 2019;42(1):184-189. doi:10.1002/clc.23107
36. Kim SJ, Peterson CE, Warnecke R, Barrett R, Glassgow AE. The Uneven Distribution of Medically Underserved Areas in Chicago. *Health Equity*. 2020;4(1):556-564. doi:10.1089/heq.2020.0023
37. Krieger N. Discrimination and health inequities. *Int J Health Serv*. 2014;44(4):643-710. doi:10.2190/HS.44.4.b
38. Institute of Medicine Committee on U, Eliminating R, Ethnic Disparities in Health C. In: Smedley BD, Stith AY, Nelson AR, eds. *Unequal Treatment: Confronting Racial and Ethnic Disparities in Health Care*. National Academies Press (US) Copyright 2002 by the National Academy of Sciences. All rights reserved.; 2003.
39. Shavers VL, Fagan P, Jones D, et al. The state of research on racial/ethnic discrimination in the receipt of health care. *American journal of public health*. May 2012;102(5):953-66. doi:10.2105/ajph.2012.300773
40. Disparities NIoMHaH. NIMHD Research Framework. 2017.
41. Halawa OA, Kolli A, Oh G, et al. Racial and Socioeconomic Differences in Eye Care Utilization among Medicare Beneficiaries with Glaucoma. *Ophthalmology*. Oct 6 2021;doi:10.1016/j.optha.2021.09.022
42. J B-G, GJ D, PK K, N S. Do Neighborhoods Influence Child and Adolescent Development? *American Journal of Sociology*. 1993;99(2):353-395.
43. Giordano GN, Ohlsson H, Lindström M. Social capital and health--purely a question of context? *Health Place*. Jul 2011;17(4):946-53. doi:10.1016/j.healthplace.2011.04.004
44. Waverijn G, Wolfe MK, Mohnen S, Rijken M, Spreeuwenberg P, Groenewegen P. A prospective analysis of the effect of neighbourhood and individual social capital on changes in self-rated health of people with chronic illness. *BMC Public Health*. 2014/07/03 2014;14(1):675. doi:10.1186/1471-2458-14-675
45. Mohnen SM, Groenewegen PP, Völker B, Flap H. Neighborhood social capital and individual health. *Soc Sci Med*. Mar 2011;72(5):660-7. doi:10.1016/j.socscimed.2010.12.004
46. Lindén-Boström M, Persson C, Eriksson C. Neighbourhood characteristics, social capital and self-rated health--a population-based survey in Sweden. *BMC Public Health*. Oct 21 2010;10:628. doi:10.1186/1471-2458-10-628
47. Wilson WJ. *The truly disadvantaged: the inner city, the underclass, and public policy*. 2 ed. 2012.
48. Williams DR, Lawrence JA, Davis BA, Vu C. Understanding how discrimination can affect health. *Health Serv Res*. Dec 2019;54 Suppl 2(Suppl 2):1374-1388. doi:10.1111/1475-6773.13222

49. Gaston GB, Alleyne-Green B. The impact of African Americans' beliefs about HIV medical care on treatment adherence: a systematic review and recommendations for interventions. *AIDS Behav.* Jan 2013;17(1):31-40. doi:10.1007/s10461-012-0323-x
50. Hicks PM, Elam AR, Woodward MA, et al. Perceptions of Respect From Clinicians by Patients in Racial and Ethnic Minority Groups With Eye Disease. *JAMA ophthalmology.* Feb 1 2022;140(2):125-131. doi:10.1001/jamaophthalmol.2021.5371
51. Scott AW, Elam AR, Nwanyanwu K. Addressing Disparities in Eye Care-The Time Is Now. *JAMA ophthalmology.* Sep 1 2021;139(9):935-936. doi:10.1001/jamaophthalmol.2021.2053
52. Nwanyanwu K, Scott AW, Elam AR. Addressing Disparities in Ophthalmic Research: The Time Is Now. *JAMA ophthalmology.* Dec 1 2021;139(12):1261-1262. doi:10.1001/jamaophthalmol.2021.4203
53. Xierali IM, Nivet MA, Wilson MR. Current and Future Status of Diversity in Ophthalmologist Workforce. *JAMA ophthalmology.* 2016;134(9):1016-1023. doi:10.1001/jamaophthalmol.2016.2257
54. Ding X, Gellad ZF, Mather C, 3rd, et al. Designing risk prediction models for ambulatory no-shows across different specialties and clinics. *J Am Med Inform Assoc.* Aug 1 2018;25(8):924-930. doi:10.1093/jamia/ocy002
55. McMullen MJ, Netland PA. Lead time for appointment and the no-show rate in an ophthalmology clinic. *Clin Ophthalmol.* 2015;9:513-6. doi:10.2147/opth.S82151
56. Lin H, Wu X. Intervention strategies for improving patient adherence to follow-up in the era of mobile information technology: a systematic review and meta-analysis. *PLoS One.* 2014;9(8):e104266. doi:10.1371/journal.pone.0104266
57. Handley MA, Gorukanti A, Cattamanchi A. Strategies for implementing implementation science: a methodological overview. *Emerg Med J.* Sep 2016;33(9):660-4. doi:10.1136/emered-2015-205461
58. Nwanyanwu K. Participatory Science-The Path Toward Health Equity. *JAMA ophthalmology.* Feb 1 2022;140(2):132-133. doi:10.1001/jamaophthalmol.2021.5368

**TABLE 1: INDIVIDUAL CHARACTERISTICS IN PATIENTS SCHEDULED FOR OPHTHALMOLOGY APPOINTMENT BY ADHERENCE**

|                                             | <b>Overall</b><br>n=8,322 | <b>Adherent</b><br>n=5,988 | <b>Non-adherent</b><br>n=2,334 | <b>P-value</b> |
|---------------------------------------------|---------------------------|----------------------------|--------------------------------|----------------|
| <b>Individual Characteristics</b>           |                           |                            |                                |                |
| Mean Age (years $\pm$ SD)                   | 56.7 $\pm$ 17.1           | 57.7 $\pm$ 16.9            | 54.2 $\pm$ 17.3                | <0.01          |
| Median Distance to Clinic (miles $\pm$ IQR) | 7.0 $\pm$ 10              | 7.5 $\pm$ 11.8             | 6.9 $\pm$ 9.3                  | <0.001         |
|                                             | n (%)                     |                            |                                |                |
| Gender                                      |                           |                            |                                |                |
| Female                                      | 4,924 (59.2)              | 3552 (72.1)                | 1372 (27.9)                    | 0.67           |
| Male                                        | 3,397 (40.8)              | 2435 (71.7)                | 962 (28.3)                     |                |
| New Patient                                 |                           |                            |                                |                |
| Yes                                         | 2,470 (29.7)              | 1675 (67.8)                | 795 (32.2)                     | <0.01          |
| No                                          | 5,852 (70.3)              | 4313 (73.7)                | 1539 (26.3)                    |                |
| Race                                        |                           |                            |                                |                |
| Asian                                       | 362 (4.40)                | 297 (82.0)                 | 65 (18.0)                      | <0.01          |
| Black                                       | 3,429 (41.2)              | 2191 (63.9)                | 1238 (36.1)                    |                |
| Hispanic                                    | 2,006 (24.1)              | 1398 (69.7)                | 608 (30.3)                     |                |
| White                                       | 1,822 (21.9)              | 1586 (87.1)                | 236 (13.0)                     |                |
| Other                                       | 703 (8.5)                 | 516 (73.4)                 | 187 (26.6)                     |                |
| Insurance Type                              |                           |                            |                                |                |
| Medicaid                                    | 2,871 (34.5)              | 1840 (64.1)                | 1031 (35.9)                    | <0.01          |
| Medicare                                    | 3,094 (37.2)              | 2334 (75.4)                | 760 (24.6)                     |                |
| Private                                     | 1,957 (23.5)              | 1551 (79.3)                | 406 (20.8)                     |                |
| Self-Pay                                    | 264 (3.2)                 | 144 (54.5)                 | 120 (45.5)                     |                |
| Other Public                                | 114 (1.4)                 | 98 (86.0)                  | 16 (14.0)                      |                |
| Worker's Comp                               | 22 (0.3)                  | 21 (95.5)                  | 1 (4.5)                        |                |

576

577

578

579

580

581

582

583

| <b>TABLE 2: MULTIVARIABLE MODEL OF SOCIAL VULNERABILITY INDEX (SVI) WITH NON-ADHERENCE ADJUSTING FOR INDIVIDUAL LEVEL COVARIATES</b> |                   |                                |                |
|--------------------------------------------------------------------------------------------------------------------------------------|-------------------|--------------------------------|----------------|
| <b>Covariate</b>                                                                                                                     | <b>Odds Ratio</b> | <b>95% Confidence Interval</b> | <b>P-value</b> |
| <b>Overall SVI</b>                                                                                                                   | 2.46              | (1.99, 3.06)                   | <0.01          |
| <b>Age at encounter</b>                                                                                                              | 0.99              | (0.99, 0.99)                   | <0.01          |
| <b>Gender</b>                                                                                                                        |                   |                                |                |
| Female                                                                                                                               | Ref               | Ref                            | Ref            |
| Male                                                                                                                                 | 1.13              | (1.02, 1.25)                   | 0.02           |
| <b>New Patient</b>                                                                                                                   |                   |                                |                |
| No                                                                                                                                   | Ref               | Ref                            | Ref            |
| Yes                                                                                                                                  | 1.19              | (1.07, 1.33)                   | <0.01          |
| <b>Race</b>                                                                                                                          |                   |                                |                |
| White                                                                                                                                | Ref               | Ref                            | Ref            |
| Asian                                                                                                                                | 1.27              | (0.93, 1.94)                   | 0.10           |
| Black                                                                                                                                | 2.84              | (2.39, 3.37)                   | <0.01          |
| Hispanic                                                                                                                             | 2.13              | (1.78, 2.55)                   | <0.01          |
| Other                                                                                                                                | 2.04              | (1.63, 2.55)                   | <0.01          |
| <b>Distance to clinic</b>                                                                                                            | 1.00              | (1.00, 1.00)                   | 0.40           |

## Figure Legends

**FIGURE 1: SOCIAL VULNERABILITY INDEX (SVI).** Social factors are categorized into 4 themes which make up the overall SVI.

**FIGURE 2: THEMED MEDIAN SOCIAL VULNERABILITY INDEX (SVI) BY APPOINTMENT STATUS.**

**FIGURE 3: PROBABILITY OF NON-ADHERENCE USING SOCIAL VULNERABILITY INDEX (SVI).** Looking at each race individually, as SVI increases, the probability of non-adherence increases, adjusting for all other variables.



## Socioeconomic Status

- Below Poverty
- Unemployed
- Income
- No High School Diploma

medRxiv preprint doi: <https://doi.org/10.1101/2022.06.22.22276771>; this version posted June 23, 2022. The copyright holder for this preprint (which was not certified by peer review) is the author/funder, who has granted medRxiv a license to display the preprint in perpetuity. All rights reserved. No reuse allowed without permission.

## Household Composition & Disability

- Aged 65 or Older
- Aged 17 or Younger
- Older than Age 5 with a Disability
- Single-Parent Households

## Minority Status & Language

- Minority
- Speaks English "Less than Well"

## Housing Type & Transportation

- Multi-Unit Structures
- Mobile Homes
- Crowding
- No Vehicle
- Group Quarters



■ Non-Adherent ■ Adherent

## Overall CDC SVI

medRxiv preprint doi: <https://doi.org/10.1101/2022.06.22.22276771>; this version posted June 23, 2022. The copyright holder for this preprint (which was not certified by peer review) is the author/funder, who has granted medRxiv a license to display the preprint in perpetuity. All rights reserved. No reuse allowed without permission.

## Socioeconomic Status

## Household Composition & Disability

## Minority Status & Language

## Housing Type & Transportation

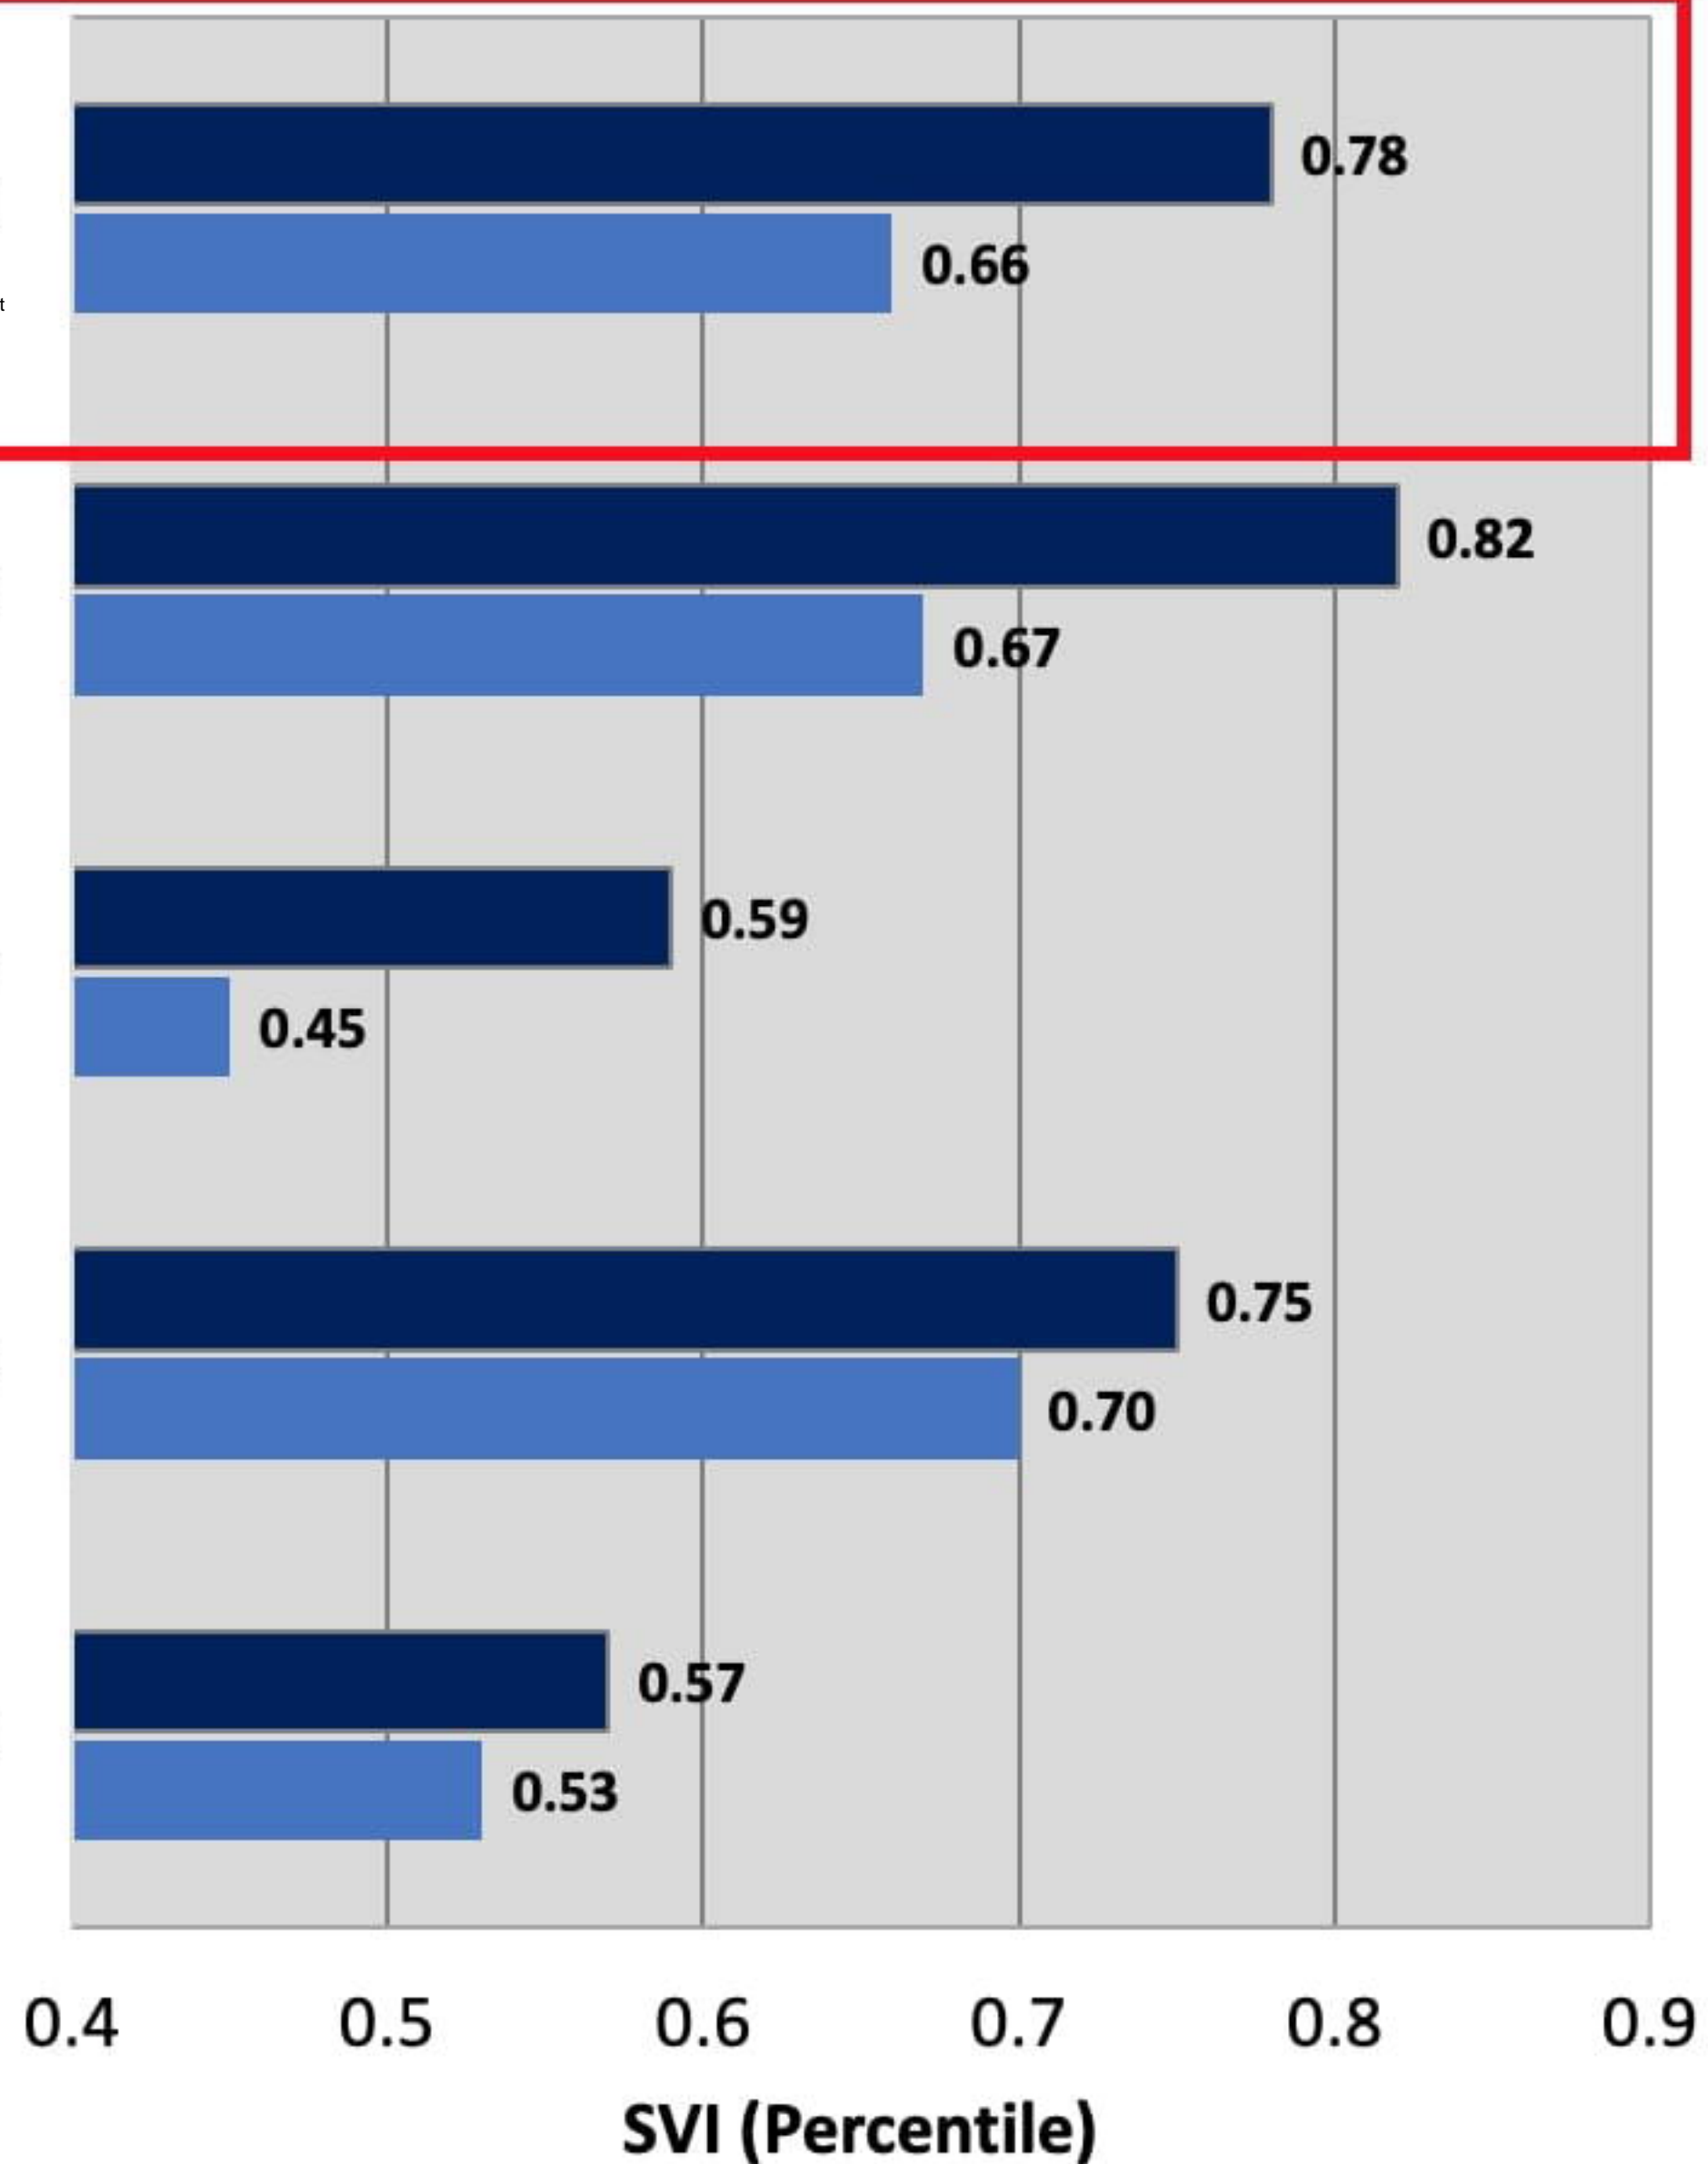

Probability of Non-adherence

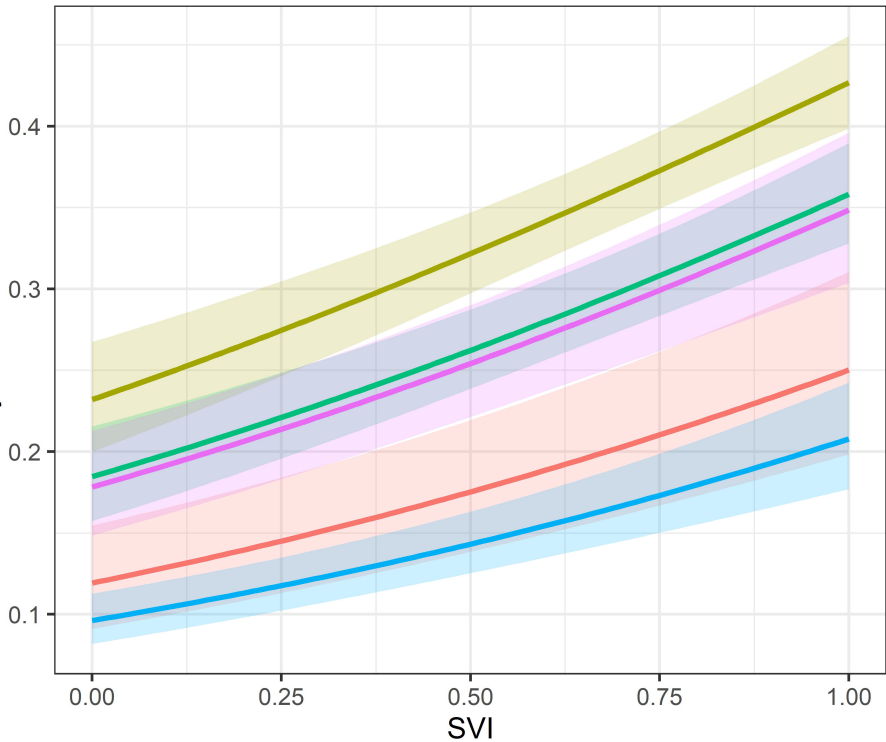

Race

- Asian
- Black
- Hispanic
- White
- Other
